# Supplementary material
Source: publisher figshare collection journal article supplement (https://aacr.figshare.com/articles/dataset/_/22651581)
Supplement: Supplementary file 1 [file 40209234]

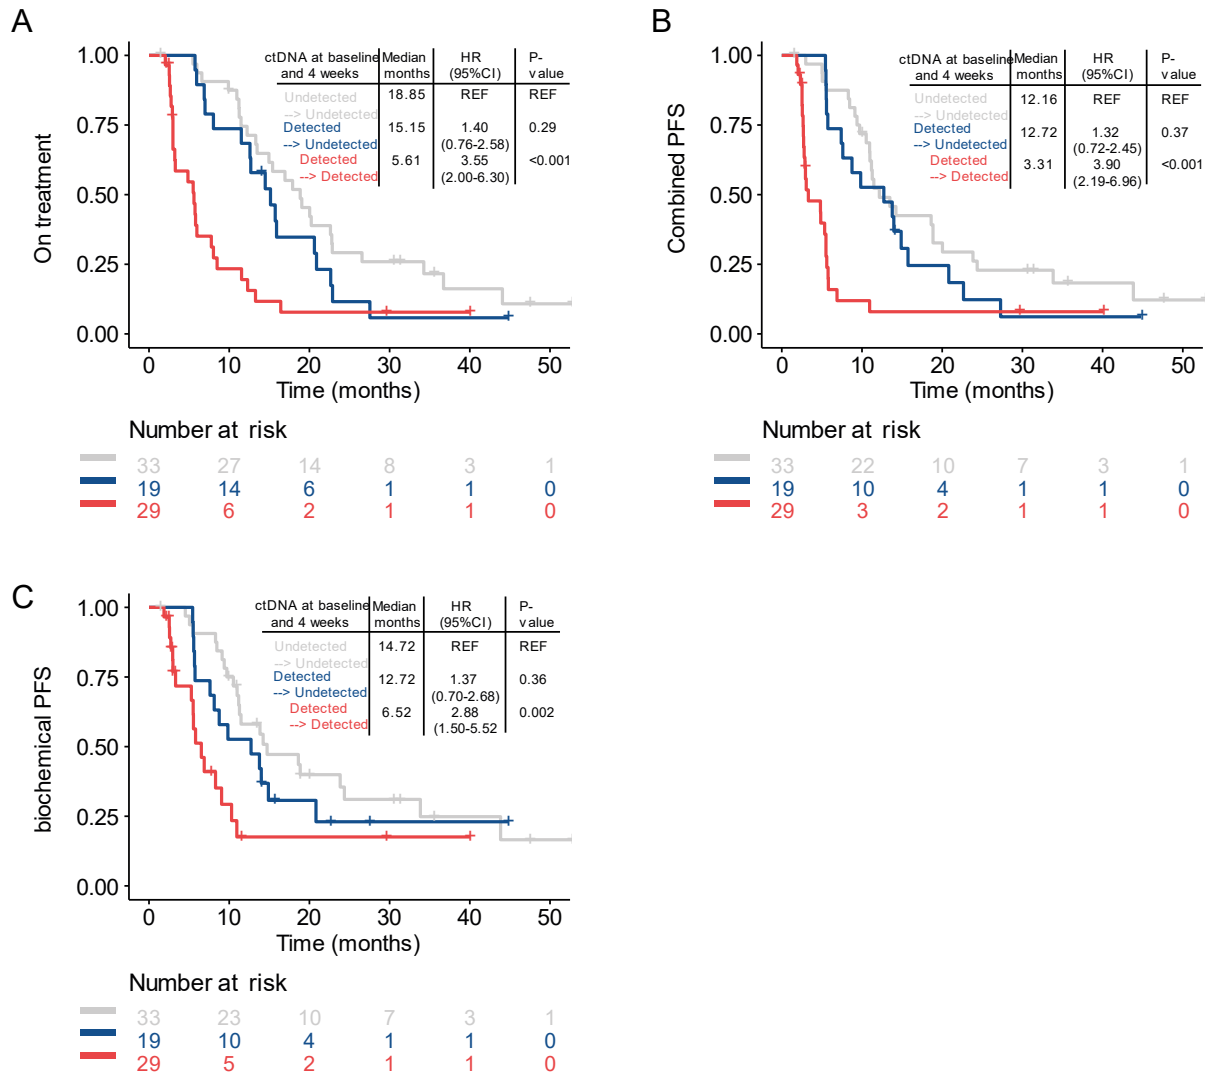

**Supplementary Figure S6.** Relationship between on-treatment detection of circulating tumor DNA patient outcomes. Time on treatment (**A**), combined progression-free survival (**B**) and biochemical progression-free survival (**C**) according to change in ctDNA detection status after 4 weeks of treatment.
